# Supplementary material for: Low urine pH predicts new onset of diabetes mellitus during a 10‐year period in men: BOREAS‐DM1 study
Source: PubMed Central journal article supplement — J Diabetes Investig. 2020 Jun 7;11(6):1490–7. doi: 10.1111/jdi.13284 (PMC7610131; doi:10.1111/jdi.13284), 2020-06-07
Supplement: JDI-11-1490-s001.pdf [file JDI-11-1490-s001.pdf]

Supplementary Table 1. Characteristics of the recruited and excluded subjects

|                                 | Recruited<br>N = 12,476 | Excluded<br>N = 16,514 | p       |
|---------------------------------|-------------------------|------------------------|---------|
| Age, years                      | 47 ± 9                  | 42 ± 13                | < 0.001 |
| Sex, male                       | 8,027 (64.3)            | 9,861 (59.7)           | < 0.001 |
| Body mass index                 | 23.1 ± 3.3              | 22.8 ± 3.6             | < 0.001 |
| Obesity*                        | 3,780 (30.3)            | 4,436 (28.0)           | < 0.001 |
| Systolic blood pressure, mmHg   | 116 ± 16                | 115 ± 17               | < 0.001 |
| Diastolic blood pressure, mmHg  | 74 ± 11                 | 72 ± 11                | < 0.001 |
| Smoking habit                   | 4,362 (35.8)            | 5,873 (39.1)           | < 0.001 |
| Alcohol drinking habit          | 3,274 (26.2)            | 3400 (20.6)            | < 0.001 |
| Family history of DM            | 2,174 (17.4)            | 2,568 (18.0)           | 0.199   |
| Medications                     |                         |                        |         |
| Anti-hypertensive drugs         | 714 (9.9)               | 255 (6.6)              | 0.461   |
| Anti-dyslipidemic drugs         | 1,108 (8.9)             | 1,315 (9.5)            | 0.326   |
| Biochemical data                |                         |                        |         |
| Albumin, g/dL                   | 4.3 ± 0.2               | 4.3 ± 0.2              | 0.116   |
| eGFR, mL/min/1.73m <sup>2</sup> | 85 ± 13                 | 84 ± 17                | < 0.001 |
| Uric acid, mg/dL                | 5.4 ± 1.4               | 5.4 ± 1.4              | 0.111   |
| Fasting glucose, mg/dL          | 89 ± 9                  | 95 ± 25                | < 0.001 |
| HbA1c, %                        | 5.2 ± 0.3               | 5.7 ± 1.1              | < 0.001 |
| AST, U/L                        | 21 (18-26)              | 20 (17-25)             | < 0.001 |
| ALT, U/L                        | 20 (15-30)              | 19 (14-29)             | < 0.001 |
| γGTP, U/L                       | 30 (19-55)              | 27 (17-49)             | < 0.001 |
| Total cholesterol, mg/dL        | 204 ± 33                | 199 ± 35               | < 0.001 |
| LDL cholesterol, mg/dL          | 121 ± 30                | 116 ± 32               | < 0.001 |
| HDL cholesterol, mg/dL          | 61 ± 15                 | 62 ± 16                | < 0.001 |
| Triglycerides, mg/dL            | 91 (63-135)             | 86 (58-131)            | < 0.001 |
| Urine pH                        | 5.9 ± 0.7               | 6.0 ± 0.7              | < 0.001 |

Variables are expressed as number (%), means ± SD or medians (interquartile ranges).

\*Obesity was defined as body mass index ≥ 25.

AST, aspartate aminotransferase; ALT, alanine aminotransferase; γGTP, γ-glutamyl transpeptidase; DM, diabetes mellitus; eGFR, estimated glomerular filtration rate; HDL, high-density lipoprotein; LDL, low-density lipoprotein.

Supplementary Table 2. Cox proportional hazard analyses for new onset of DM including liver function as a covariate in males (n = 8,027)

|                               | Model 1          |         | Model 2          |         | Model 3          |         |
|-------------------------------|------------------|---------|------------------|---------|------------------|---------|
|                               | HR (95% CI)      | p       | HR (95% CI)      | p       | HR (95% CI)      | p       |
| U-pH ≤ 5.0                    | 1.39 (1.07-1.80) | 0.011   | 1.36 (1.05-1.76) | 0.016   | 1.37 (1.06-1.77) | 0.015   |
| U-pH = 5.5                    | 1.19 (0.92-1.52) | 0.168   | 1.14 (0.89-1.46) | 0.298   | 1.17 (0.91-1.50) | 0.209   |
| U-pH = 6.0                    | 1.08 (0.81-1.43) | 0.587   | 1.05 (0.79-1.38) | 0.729   | 1.04 (0.78-1.37) | 0.774   |
| U-pH ≥ 6.5                    | Reference        | -       | Reference        | -       | Reference        | -       |
| Age (per 10 years)            | 1.20 (1.07-1.33) | < 0.001 | 1.25 (1.12-1.39) | < 0.001 | 1.20 (1.07-1.25) | < 0.001 |
| Obesity*                      | 1.67 (1.38-2.01) | < 0.001 | 1.50 (1.23-1.82) | < 0.001 | 1.71 (1.42-2.00) | < 0.001 |
| Fasting glucose (≥ 100 mg/dL) | 9.5 (7.8-11.5)   | < 0.001 | 9.3 (7.7-11.3)   | < 0.001 | 9.3 (7.6-11.3)   | < 0.001 |
| Smoking habit                 | 1.78 (1.48-2.13) | < 0.001 | 1.76 (1.46-2.11) | < 0.001 | 1.72 (1.43-2.00) | < 0.001 |
| Alcohol drinking habit        | 0.79 (0.65-0.95) | 0.016   | 0.84 (0.70-1.02) | 0.081   | 0.77 (0.64-0.94) | 0.010   |
| Family history of DM          | 1.42 (1.15-1.74) | < 0.001 | 1.39 (1.14-1.71) | < 0.001 | 1.41 (1.15-1.79) | < 0.001 |
| Anti-hypertensive drugs       | 1.19 (0.92-1.53) | 0.174   | 1.18 (0.92-1.52) | 0.182   | 1.16 (0.90-1.49) | 0.243   |
| Anti-dyslipidemic drugs       | 1.62 (1.17-2.23) | < 0.001 | 1.65 (1.19-2.28) | < 0.001 | 1.61 (1.17-2.23) | 0.003   |
| AST (per 1 U/L)               | 1.01 (1.01-1.02) | < 0.001 | -                | -       | -                | -       |
| ALT (per 1 U/L)               | -                | -       | 1.01 (1.01-1.01) | < 0.001 | -                | -       |
| γGTP (per 1 U/L)              | -                | -       | -                | -       | 1.00 (1.00-1.01) | < 0.001 |
|                               | (AIC = 7,770)    |         | (AIC = 7,744)    |         | (AIC = 7,774)    |         |

\*Obesity was defined as body mass index ≥ 25.

AIC, Akaike's information criterion; AST, aspartate aminotransferase; ALT, alanine aminotransferase; CI, confidence interval; DM, diabetes mellitus; γGTP, γ-glutamyl transpeptidase; HR, hazard ratio; U-pH, urine pH.

Supplementary Table 3. Cox proportional hazard analyses for new onset of DM including liver function as a covariate in females (n =4,449)

|                               | Model 1          |         | Model 2          |         | Model 3          |         |
|-------------------------------|------------------|---------|------------------|---------|------------------|---------|
|                               | HR (95% CI)      | p       | HR (95% CI)      | p       | HR (95% CI)      | p       |
| U-pH ≤ 5.0                    | 1.01 (0.61-1.65) | 0.963   | 1.01 (0.62-1.66) | 0.949   | 1.02 (0.62-1.66) | 0.936   |
| U-pH = 5.5                    | 1.15 (0.72-1.83) | 0.543   | 1.16 (0.73-1.84) | 0.529   | 1.17 (0.74-1.86) | 0.495   |
| U-pH = 6.0                    | 0.99 (0.58-1.69) | 0.995   | 0.99 (0.58-1.69) | 0.998   | 1.01 (0.59-1.71) | 0.956   |
| U-pH ≥ 6.5                    | Reference        | -       | Reference        | -       | Reference        | -       |
| Age (per 10 years)            | 1.33 (1.07-1.64) | 0.007   | 1.34 (1.09-1.66) | 0.005   | 1.35 (1.09-1.66) | 0.004   |
| Obesity*                      | 2.55 (1.76-3.70) | < 0.001 | 2.51 (1.71-3.68) | < 0.001 | 2.59 (1.78-3.76) | < 0.001 |
| Fasting glucose (≥ 100 mg/dL) | 12.1 (8.3-17.5)  | < 0.001 | 12.1 (8.4-17.6)  | < 0.001 | 12.3 (8.5-17.8)  | < 0.001 |
| Smoking habit                 | 1.38 (0.89-2.14) | 0.148   | 1.38 (0.89-2.15) | 0.141   | 1.38 (0.89-2.14) | 0.146   |
| Alcohol drinking habit        | 0.93 (0.53-1.59) | 0.788   | 0.93 (0.54-1.61) | 0.822   | 0.92 (0.53-1.59) | 0.772   |
| Family history of DM          | 1.74 (1.19-2.55) | 0.004   | 1.74 (1.19-2.55) | 0.004   | 1.73 (1.18-2.54) | 0.004   |
| Anti-hypertensive drugs       | 1.23 (0.74-2.04) | 0.423   | 1.21 (0.73-2.02) | 0.445   | 1.20 (0.72-2.00) | 0.466   |
| Anti-dyslipidemic drugs       | 1.58 (0.87-2.85) | 0.128   | 1.60 (0.88-2.89) | 0.117   | 1.65 (0.91-2.96) | 0.093   |
| AST                           | 1.01 (0.99-1.02) | 0.206   | -                | -       | -                | -       |
| ALT                           | -                | -       | 1.00 (0.99-1.01) | 0.403   | -                | -       |
| γGTP                          | -                | -       | -                | -       | 1.00 (0.99-1.01) | 0.809   |
|                               | (AIC = 1,803)    |         | (AIC = 1,804)    |         | (AIC = 1,804)    |         |

\*Obesity was defined as body mass index ≥ 25.

AIC, Akaike's information criterion; AST, aspartate aminotransferase; ALT, alanine aminotransferase; CI, confidence interval; DM, diabetes mellitus; γGTP, γ-glutamyl transpeptidase; HR, hazard ratio; U-pH, urine pH.
